# Supplementary material
Source: PubMed Central journal article supplement (PMC170936)
Supplement: pnas_1432964100_1.pdf [file pnas_1432964100_1.pdf]

## Supporting Materials and Methods

**Plasmid Construction.** To create the pLJ-YAAA and pLJ-FAAA mutants, double-stranded blunt-*Xba*I oligos as indicated below were subcloned into *Stu*I-*Xba*I-digested pGMT vector (YAAA: 5'-agt acg ccg ccg ccg aag atc tgt at-3'; FAAA: 5'-agt ttg ccg ccg ccg aag atc tgt at-3'). The *Bam*HI-*Xho*I fragments from each resulting plasmid were subcloned into *Bam*HI-*Sal*I-digested pLJ vector. Site-directed mutagenesis was performed (Stratagene) to create a point mutation for M253A by using the primers 5'-cct att ctg tcg cga gga gcc actcct at-3' and 5'-agt ggc tcc tcg cga cag aat agg tcg gg-3'. For the add-back mutants, double-stranded oligos were subcloned into a unique restriction site, *Esp*I (1) (EEEEYMPM: 5'-tga gcg aag aag aag aag aat aca tgc caa tgt-3'; EEEEFMPM: 5'-tga gcg aag aag aag aag aat tca tgc caa tgt-3'; EEEEEYAAA: 5'-tga gcg aag aag aag aag aat acg ccg ccg cct-3'). Insertion into the *Esp*I site resulted in an additional serine at the beginning and a leucine at the end of the insertion, respectively.

**Cells and Tissue Culture.** The Bosc 23 viral packaging cell line (2) was grown in DMEM with 10% FBS supplemented with 100 units/ml penicillin and 100 µg/ml streptomycin (Invitrogen) in 10% CO<sub>2</sub>. BALBc/3T3 fibroblasts (clone A31) were grown in DMEM with 10% CS, supplemented with 100 units/ml penicillin and 100 µg/ml streptomycin in 10% CO<sub>2</sub>.

**Retroviral Infections and Establishment of BALBc/3T3 Clones.** Bosc 23 cells were transfected with 10 µg of DNA constructs by using the BES method as described (3). Infections with viral supernatants, drug selection, and isolation of G418-resistant colonies were carried out as described (4).

**Antibodies, Immunoprecipitations, and Immunoblotting.** Rabbit anti-ShcA antibody (Upstate Biotechnology) and rabbit anti-MT antibody 18-8 (5) were used for immunoprecipitations. Mouse anti-ShcA antibody (BD Transduction Laboratories),

mouse anti-MT antibody F4 (5), rabbit anti-phospho-Akt antibody (Cell Signaling Technologies), and rabbit anti-Akt antibody (Cell Signaling Technologies) were used for immunoblotting. Rabbit anti-p85 antibody R32 (K. Auger and T.M.R., unpublished work) was used for immunoprecipitations and immunoblotting. Confluent 100- or 150-mm dishes of cells were incubated in DMEM with 0.1% CS overnight. Cells were rinsed twice with 1× PBS solution, lysed in NP-40 lysis buffer (20 mM Tris, pH 8.0/137 mM NaCl/1% Nonidet P-40/10% glycerol/ 5 mM EDTA) with inhibitors (25 mM β-glycerophosphate, 1 mM Na<sub>3</sub>VO<sub>4</sub>, 0.03 units/ml aprotinin, 1 μg/ml leupeptin, 1 μg/ml pepstatin, 100 mM PMSF) for 30 min and harvested. Protein concentrations were normalized by using the Bradford assay (Bio-Rad) and used in Western blots or further used for immunoprecipitation. Approximately 1 mg of total protein was used for each immunoprecipitated sample. A 50-μl slurry of protein A agarose beads was used for each sample along with 1–2 μl of appropriate antibody. Protein A agarose beads were blocked with 3% BSA for 90 min for Figs. 2 and 4C. Samples were incubated for 3–4 h and washed three times with NP-40 lysis buffer. SDS loading buffer was added to each sample, and they were resolved by SDS/PAGE for analysis.

**Lipid Kinase Assays.** Lipid kinase assays were performed as described (6). Briefly, after immunoprecipitation with an anti-MT antibody 18-8, beads were washed with 1% NP-40 in PBS twice, 0.5 M LiCl in 0.1 M Tris twice, TNE buffer (10 mM Tris, pH 8.0/100 mM NaCl/1 mM EDTA) once and kinase buffer (20 mM Hepes, pH 7.5/5 mM MgCl<sub>2</sub>) once. Sonicated lipid mixture of phosphatidylserine, phosphatidylinositol, and phosphatidylinositol-4,5-bisphosphate were added to washed beads and incubated at room temperature for 3 min. Thirty-five microliters of ATP mixture (kinase buffer with 10 μCi of [ $\gamma$ -<sup>32</sup>P]ATP and 10 μM cold ATP) was then added to each sample. The kinase reaction was incubated at room temperature for 10 min and stopped with 75 μl of 1 M HCl and 180 μl of a 1:1 mixture of methanol and chloroform. The organic layer was extracted, and the organic extracts were spotted on an oxalate-treated TLC Silica gel 60 plate. (On some occasions the organic layer was stored at –80°C overnight before spotting.) The plate was then developed in a chamber containing *n*-propanol/2 M acetic acid (65:35). The products

were visualized by autoradiography or phosphorimaging. Only phosphatidylinositol-3,4,5-trisphosphate was shown in the figures.

**Focus Formation Assays.** Cells were plated at  $7.5 \times 10^5$  cells per 100-mm dish, and the next day cells were infected with titered retroviral supernatants for 4–6 h in the presence of 8  $\mu\text{g/ml}$  polybrene. Infected cells were split into three plates the next day. For focus formation, media were changed every 3–4 days with DMEM containing 7% CS for  $\approx 3$  weeks without drug selection; for colony formation, the cells were selected in 500  $\mu\text{g/ml}$  G418, and media were changed every 3–4 days. The focus formation assay and one each of the G418 drug selected plates were fixed and stained with either 0.2% crystal violet or 2% methylene blue in 50% ethanol.

**Soft Agar Assays.** Approximately 4,000–6,000 G418-selected, early-passage cells were mixed with 0.3% agarose in DMEM with 10% CS and plated into six-well dishes containing 0.8% agarose in DMEM with 10% CS. Cells were fed every 5–7 days with 1 ml of DMEM with 10% CS without agarose, and allowed to grow for 3–5 weeks before being scored for growth.

1. Druker, B. J., Sibert, L. & Roberts, T. M. (1992) *J. Virol.* **66**, 5770–5776.
2. Pear, W. S., Nolan, G. P., Scott, M. L. & Baltimore, D. (1993) *Proc. Natl. Acad. Sci. USA* **90**, 8392–8396.
3. Chen, C. A. & Okayama, H. (1988) *BioTechniques* **6**, 632–638.
4. Cherington, V., Morgan, B., Spiegelman, B. M. & Roberts, T. M. (1986) *Proc. Natl. Acad. Sci. USA* **83**, 4307–4311.
5. Pallas, D. C., Schley, C., Mahoney, M., Harlow, E., Schaffhausen, B. S. & Roberts, T. M. (1986) *J. Virol.* **60**, 1075–1084.

6. Auger, K. R., Wang, J., Narsimhan, R. P., Holcombe, T. & Roberts, T. M. (2000)  
*Biochem. Biophys. Res. Commun.* **272**, 822–829.
